# Supplementary material for: Method development and application for the analysis of chiral organic marker species in ice-cores
Source: Copernicus journal article supplement (doi:10.5194/egusphere-2024-2243), 2024-09-03
Supplement: Supplementary file [file egusphere-2024-2243-AC2-supplement.pdf]

# Method development and application for the analysis of chiral organic marker species in ice cores – Supplementary information

Johanna Schäfer<sup>1</sup>, Anja Beschnitt<sup>1</sup>, Francois Burgay<sup>2</sup>, Thomas Singer<sup>2</sup>, Margit Schwikowski<sup>2</sup>, Thorsten Hoffmann<sup>1</sup>

<sup>1</sup>Department of Chemistry, Johannes Gutenberg University, Mainz, 55099, Germany

<sup>2</sup>Laboratory of Environmental Chemistry (LUC), Paul Scherrer Institute, Villigen PSI, 5232, Switzerland

Correspondence to: Thorsten Hoffmann (t.hoffmann@uni-mainz.de)

**Figure S1. Schematic experimental setup of the chamber experiments with  $\alpha$ -pinene.**

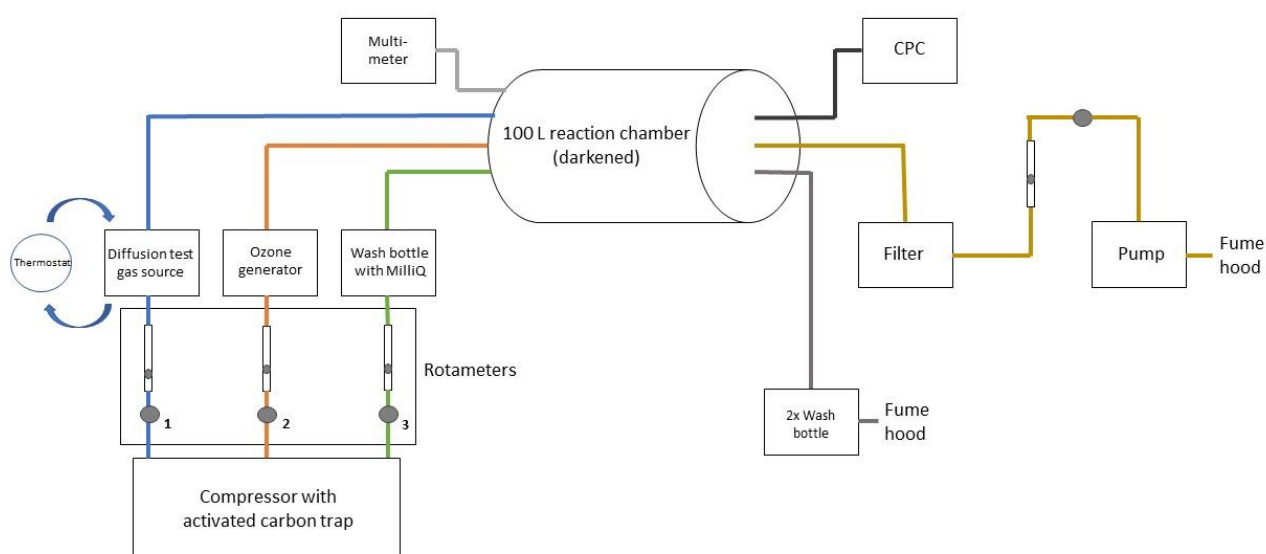

**Table S1. Tested conditions during 1D-LC method development with the chiral column, with tested eluents, column oven temperature T, flowrate and flowrate of the PCF.**

|        | Eluent A (%)                                        | Eluent B (%)                    | T (°C) | Flowrate ( $\mu\text{L}/\text{min}$ ) | Flowrate PCF ( $\mu\text{L}/\text{min}$ ) |
|--------|-----------------------------------------------------|---------------------------------|--------|---------------------------------------|-------------------------------------------|
| Eluent | 98% H <sub>2</sub> O, 20% ACN,<br>0.04% formic acid | 98% ACN,<br>2% H <sub>2</sub> O |        |                                       | 50mM NH <sub>4</sub> OH<br>in MeOH        |
| 1      | 80                                                  | 20                              | 25     | 200                                   |                                           |
| 2      | 90                                                  | 10                              | 25     | 200                                   |                                           |
| 3      | 85                                                  | 15                              | 25     | 200                                   |                                           |
| 4      | 85                                                  | 15                              | 30     | 200                                   |                                           |
| 5      | 75                                                  | 25                              | 30     | 200                                   |                                           |
| 6      | 80                                                  | 20                              | 30     | 150                                   |                                           |
| 7      | 80                                                  | 20                              | 30     | 250                                   |                                           |
| 8      | 75→90                                               | 25→10                           | 30     | 200                                   |                                           |
| 9      | 75→80                                               | 25→20                           | 30     | 200                                   |                                           |
| 10     | 80                                                  | 20                              | 40     | 200                                   |                                           |
| Eluent | MeOH                                                | ACN                             |        |                                       |                                           |
| 1      | 10                                                  | 90                              | 30     | 200                                   |                                           |
| 2      | 5                                                   | 95                              | 30     | 200                                   |                                           |
| 3      | 2                                                   | 98                              | 30     | 200                                   |                                           |
| 4      | 20                                                  | 80                              | 30     | 200                                   |                                           |
| 5      | 50                                                  | 50                              | 30     | 200                                   |                                           |
| 6      | 10                                                  | 90                              | 30     | 200                                   | 100                                       |
| Eluent | IPA                                                 | ACN                             |        |                                       |                                           |
| 1      | 10                                                  | 90                              | 30     | 200                                   | 100                                       |
| 2      | 20                                                  | 80                              | 30     | 200                                   | 100                                       |
| 3      | 5                                                   | 95                              | 30     | 200                                   | 100                                       |
| 4      | 2                                                   | 98                              | 30     | 200                                   | 100                                       |
| 5      | 40                                                  | 60                              | 30     | 200                                   | 100                                       |

**Table S2. Tested conditions during 2D-LC method development with the PFP (pump 1) and chiral column (pump 2), with eluent composition and flowrate of each pump, column oven temperature T, flow rate of the PCF and the tested time windows for peak transfer.**

| Sample loop volume ( $\mu\text{L}$ ) | Pump 1 (PFP) B (%) | Pump 1 (PFP) Flowrate ( $\mu\text{L}/\text{min}$ ) | Pump 2 (chiral) B (%) | Pump 2 (chiral) Flowrate ( $\mu\text{L}/\text{min}$ ) | Temp ( $^{\circ}\text{C}$ ) | Pin t(cut) (min) | Pinon t(cut) (min) | PCF ( $\mu\text{L}/\text{min}$ ) |
|--------------------------------------|--------------------|----------------------------------------------------|-----------------------|-------------------------------------------------------|-----------------------------|------------------|--------------------|----------------------------------|
| 100                                  | 20                 | 300                                                | 20                    | 200                                                   | 40                          | 1.75-2.00        | 2.55-2.80          |                                  |
| 100                                  | 20                 | 300                                                | 20                    | 200                                                   | 40                          | 1.55-1.80        | 2.35-2.60          |                                  |
| 100                                  | 20                 | 300                                                | 20                    | 200                                                   | 40                          | 1.45-1.70        | 2.35-2.60          |                                  |
| 100                                  | 20                 | 300                                                | 20                    | 200                                                   | 40                          | 1.65-1.90        | 2.40-2.65          |                                  |
| 100                                  | 20                 | 300                                                | 20                    | 300                                                   | 40                          | 1.65-1.90        | 2.40-2.65          |                                  |
|                                      |                    |                                                    |                       | while rinsing                                         |                             |                  |                    |                                  |
| 100                                  | 20                 | 300                                                | 20                    | 400                                                   | 40                          | 1.65-1.90        | 2.40-2.65          |                                  |
|                                      |                    |                                                    |                       | while rinsing                                         |                             |                  |                    |                                  |
| 50                                   | 20                 | 300                                                | 20                    | 200                                                   | 40                          | 1.70-1.85        | 2.45-2.60          |                                  |
| 50                                   | 20                 | 300                                                | 20                    | 200                                                   | 40                          | 1.75-1.90        | 2.40-2.55          |                                  |
| 50                                   | 20                 | 300                                                | 20                    | 200                                                   | 40                          | 1.725-1.875      | 2.425-2.575        |                                  |
| 50                                   | 20                 | 300                                                | 20                    | 200                                                   | 40                          | 1.70-1.85        | 2.40-2.55          |                                  |
|                                      |                    |                                                    |                       | 300 while rinsing                                     |                             |                  |                    |                                  |
| 50                                   | 20                 | 300                                                | 20                    | 300                                                   | 40                          | 1.70-1.85        | 2.40-2.55          |                                  |
|                                      |                    |                                                    |                       | 400 while rinsing                                     |                             |                  |                    |                                  |
| 50                                   | 20                 | 300                                                | 10                    | 200                                                   | 40                          | 1.70-1.85        | 2.40-2.55          |                                  |
| 50                                   | 20                 | 300                                                | 10                    | 400                                                   | 40                          | 1.70-1.85        | 2.40-2.55          |                                  |
|                                      |                    |                                                    |                       | 200 at 5.5min                                         |                             |                  |                    |                                  |
| 50                                   | 20                 | 300                                                | 15                    | 350                                                   | 40                          | 1.70-1.85        | 2.40-2.55          |                                  |
|                                      |                    |                                                    |                       | 200 at 5.5min                                         |                             |                  |                    |                                  |
| 50                                   | 20                 | 300                                                | 20                    | 200                                                   | 40                          | 1.70-1.85        | 2.40-2.55          | 100                              |
| 50                                   | 20                 | 300                                                | 10                    | 400                                                   | 40                          | 1.70-1.85        | 2.40-2.55          | 100                              |
|                                      |                    |                                                    |                       | 200 at 5.5min                                         |                             |                  |                    |                                  |
| 20                                   | 20                 | 200                                                | 20                    | 200                                                   | 40                          | 2.745-2.845      | 3.775-3.875        |                                  |
| 20                                   | 20                 | 200                                                | 20                    | 200                                                   | 40                          | 2.75-2.85        | 3.75-3.85          |                                  |
| 20                                   | 20                 | 200                                                | 15                    | 200                                                   | 40                          | 2.80-2.90        | 3.75-3.85          |                                  |
| 20                                   | 20                 | 200                                                | 15                    | 200                                                   | 40                          | 2.65-2.75        | 3.75-3.85          |                                  |
| 20                                   | 20                 | 200                                                | 15                    | 200                                                   | 40                          | 2.725-2.825      | 3.75-3.85          |                                  |
| 20                                   | 20                 | 200                                                | 15                    | 200                                                   | 40                          | 2.70-2.80        | 2.77-3.87          |                                  |
| 20                                   | 20                 | 200                                                | 15                    | 200                                                   | 40                          | 2.70-2.80        | 3.76-3.86          |                                  |

**Table S3. Dating and depth from the top of the ice core of the analysed Belukha ice core samples.**

| Depth (cm) | Age  |
|------------|------|
| 3402.77    | 1962 |
| 3756.92    | 1953 |
| 4451.95    | 1936 |
| 4795.83    | 1927 |
| 5326.95    | 1912 |
| 6030.70    | 1888 |
| 6418.82    | 1873 |

**Table S4. Accuracy (Acc.) of different concentrations (25 ppb, 50 ppb and 250 ppb) as percent relative deviation with respect to the standard concentration.**

| Compound        | Acc.(25 ppb) (%) | Acc.(50 ppb) (%) | Acc.(250 ppb) (%) |
|-----------------|------------------|------------------|-------------------|
| Pinic acid E1   | 3.4              | 7.2              | 4.6               |
| Pinic acid E2   | 5.6              | 7.4              | 5.4               |
| Pinonic acid E2 | 14.0             | 6.4              | 4.1               |
| Pinonic acid E2 | 9.6              | 7.1              | 5.3               |
